# Supplementary material for: Enhancing and inhibitory motifs regulate CD4 activity
Source: eLife. 2022 Jul 21;11:e79508. doi: 10.7554/eLife.79508 (PMC9333989; doi:10.7554/eLife.79508)
Supplement: Supplementary file 1. [file elife-79508-supp1.xlsx]

## Sheet: Table 2
	Figure 1 -- figure supplement 2. All values presented as percent of WT control (mutant average/WT average x 100) for normalized values
	from main figures.
	Mutant Names	CD4 DRM AUC	CD4 DSM AUC	CTxB DRM AUC	CTxB DSM AUC	Lck DRM AUC	Lck DSM AUC	Lck Total AUC	IL-2 magnitude	IL-2 sensitivity	CD4 expression	CD4 endocytosis
	WT	100	100	100	100	100	100	100	100	100	100	100
	TMD	118.678	97.6054	86.5332	75.4901	92.1544	93.407	92.9828	70.6538	65.5937	110.87	105.087
	Palm	72.9177	102.548	92.2498	92.0651	57.3563	128.547	103.605	52.4967	31.942	90.3986	84.5731
	Clasp	72.7399	103.698	37.9103	88.5697	28.7858	31.9712	30.857	34.2156	11.4828	99.2754	49.1484
	TP	52.9732	104.604	52.4772	88.5904	46.3441	164.144	122.879	27.9132	9.88391	83.8768	76.5191
	TPC	65.1826	104.645	35.1737	74.2558	22.4195	18.3241	19.7605	25.2944	10.0422	99.2754	33.0623
	H	68.9437	103.867	53.7938	44.2509	25.465	25.6086	25.5741	294.673	562.718	116.776	8.2753
	HC	90.6323	101.293	33.2522	20.4528	22.9916	10.904	13.9761	214.958	314.047	161.946	-9.83204
	LL	96.1673	101.341	90.2469	88.51	47.1362	49.4879	48.9724	280.696	397.469	127.725	-4.38966
	SS	63.4692	102.256	93.0273	99.234	123.939	282.051	247.216	45.402	24.5719	41.633	31.2423
	pSS	104.102	99.7256	75.0484	75.7969	69.9208	94.4371	89.027	116.378	141.755	86.5859	34.2052
	LL+pSS	64.2414	103.053	57.4679	74.129	34.7527	71.3159	63.2463	119.415	124.167	67.6537	-1.17438
	AUC	Area Under the Curve
	CTxB	Cholera Toxin subunit B
	DRM	Detergent Resistant Membrane
	DSM	Detergent Soluble Membrane
