# Supplementary figures and images for: Enhancing and inhibitory motifs regulate CD4 activity
Source: eLife journal article supplement (doi:10.7554/elife.79508), 2022-07-21

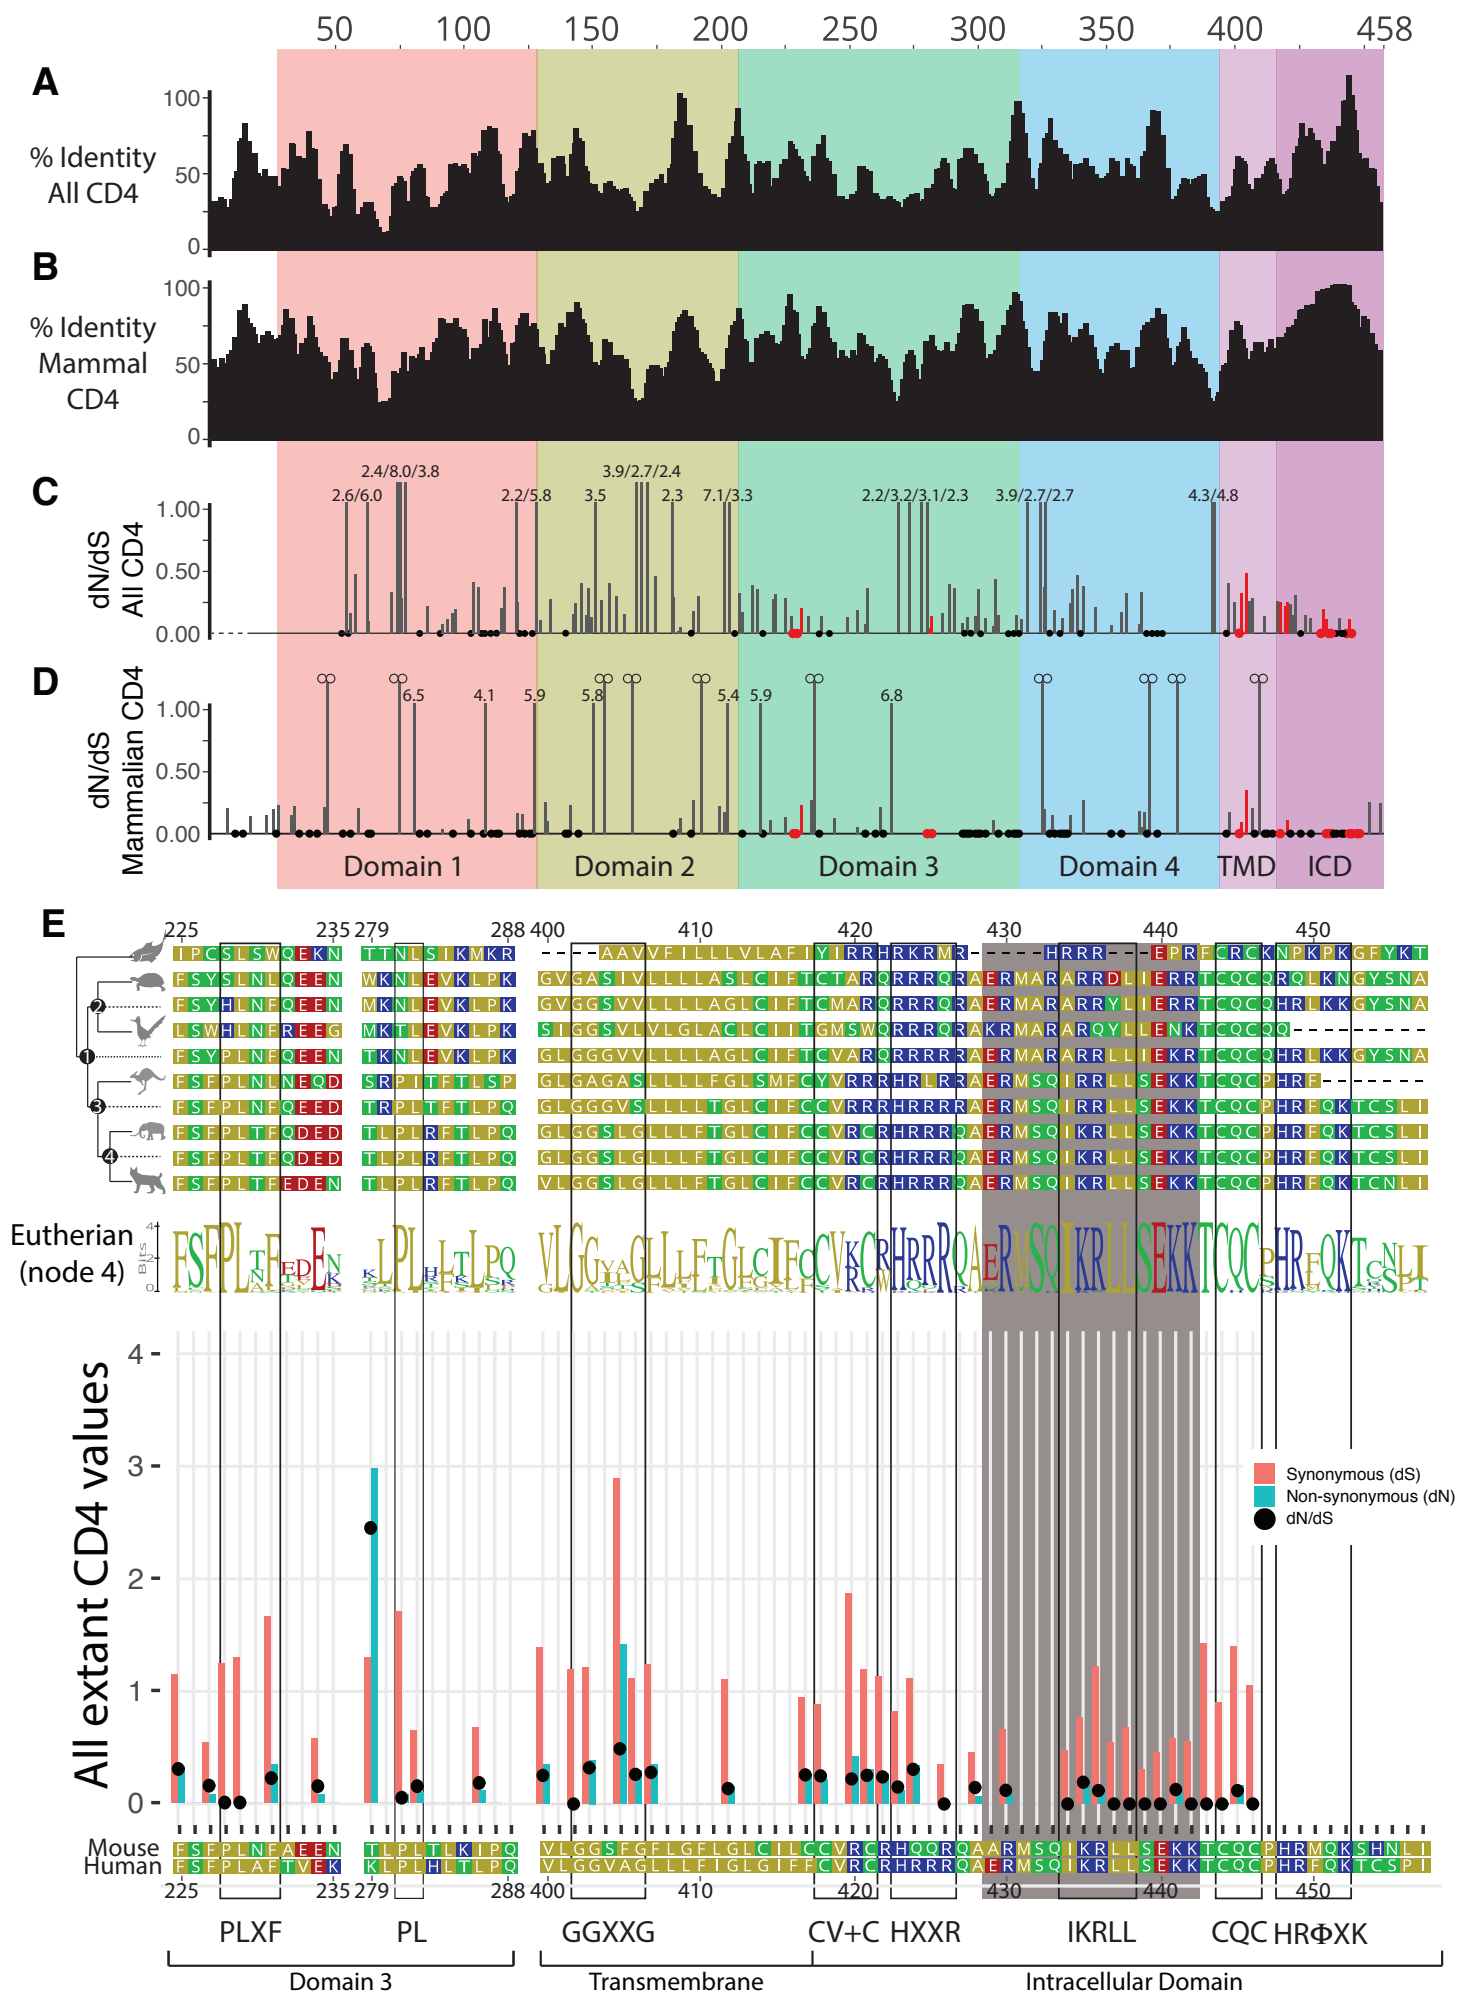

Supplement: supp [file elife_poa_e79508_Figure_1_figure_supplement_1.pdf › elife_poa_e79508_Figure_1_figure_supplement_1.pdf]

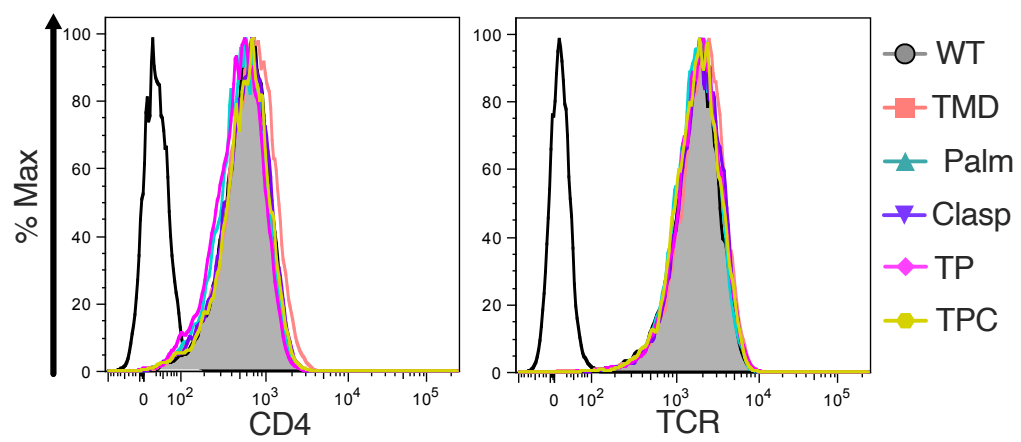

Figure 2 — figure supplement 1

Supplement: supp [file elife_poa_e79508_Figure_2_figure_supplement_1.pdf › elife_poa_e79508_Figure_2_figure_supplement_1.pdf]

● WT ■ TMD ▲ Palm ▼ Clasp ◆ TP ● TPC

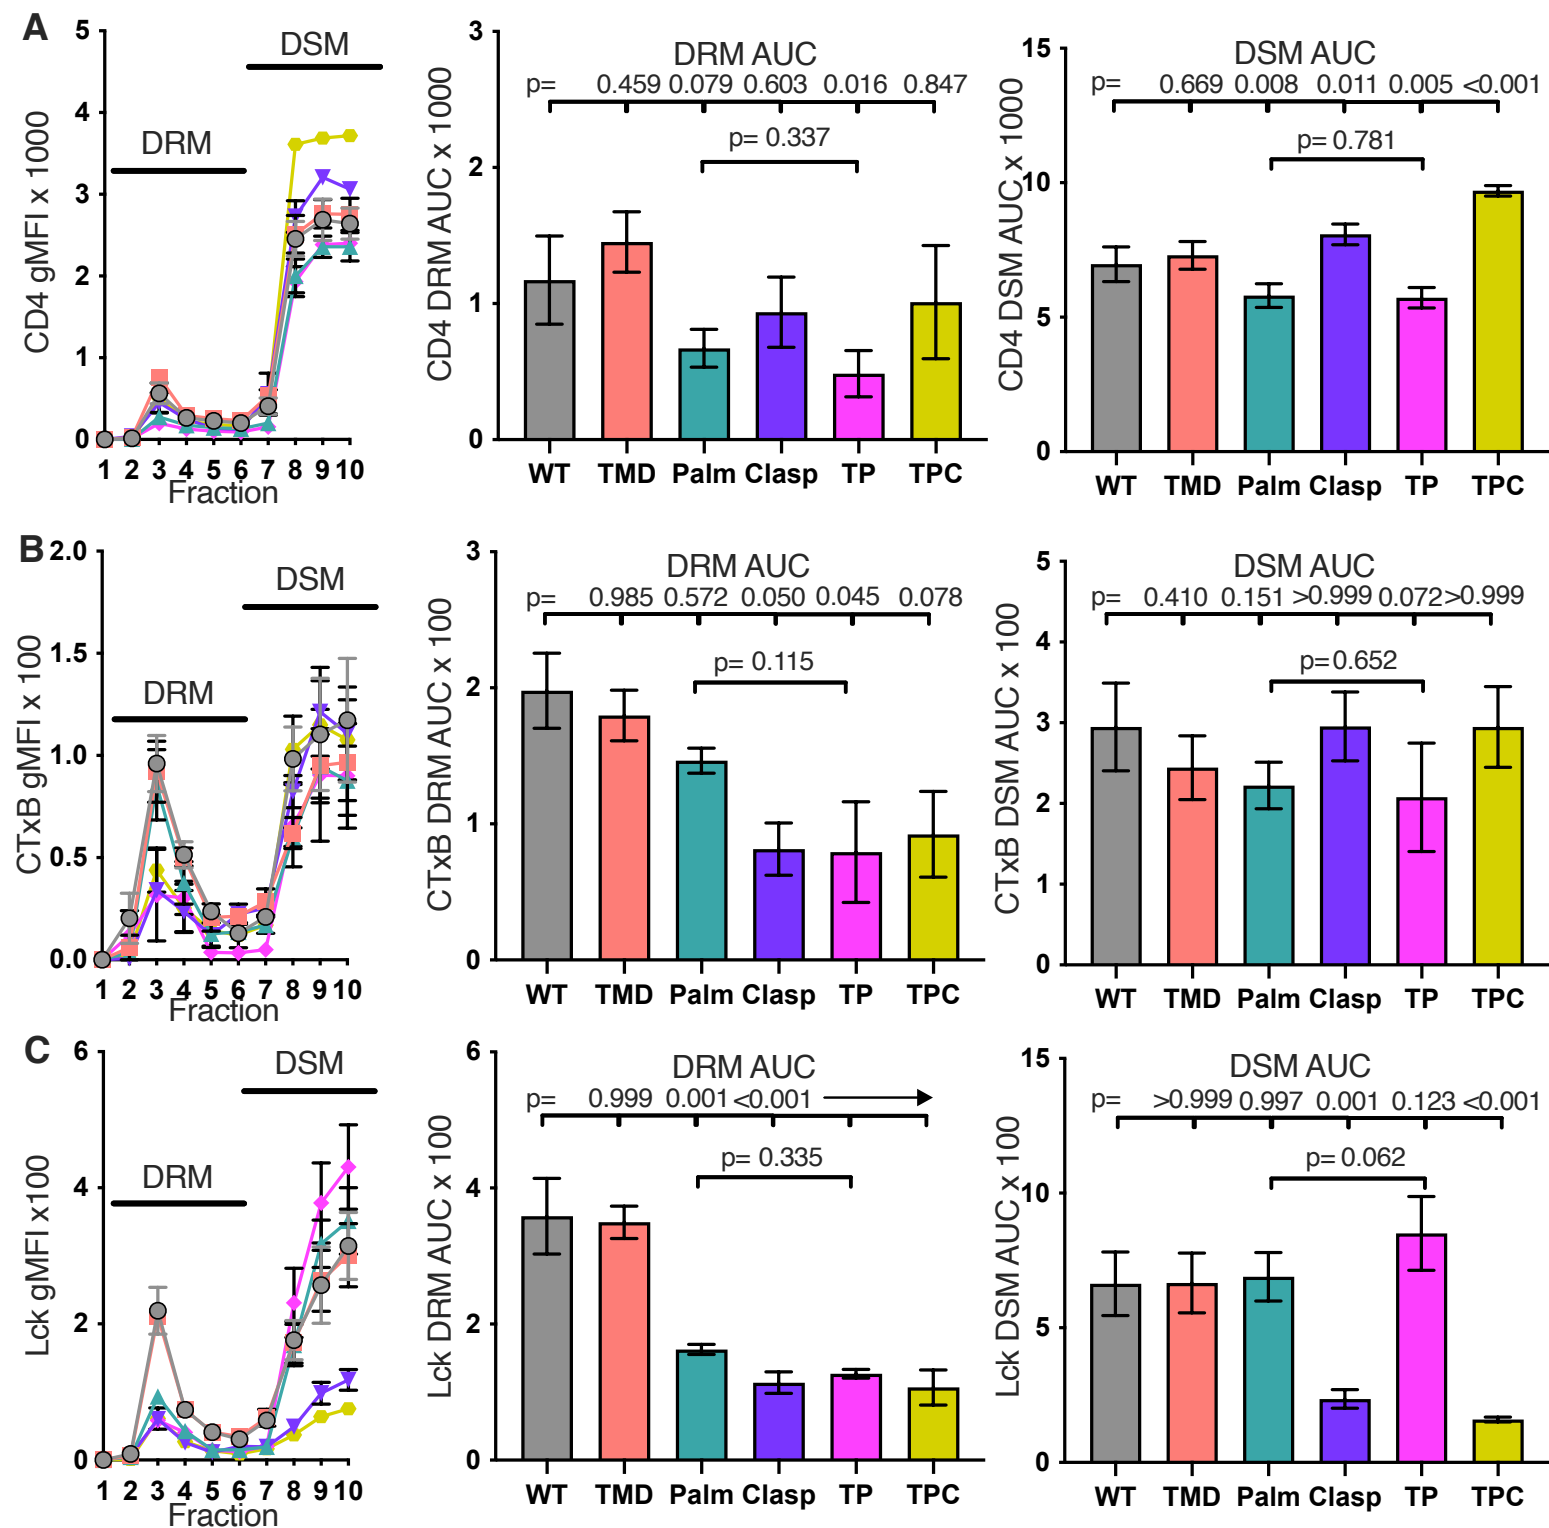

Figure 2 — figure supplement 2

Supplement: supp [file elife_poa_e79508_Figure_2_figure_supplement_2.pdf › elife_poa_e79508_Figure_2_figure_supplement_2.pdf]

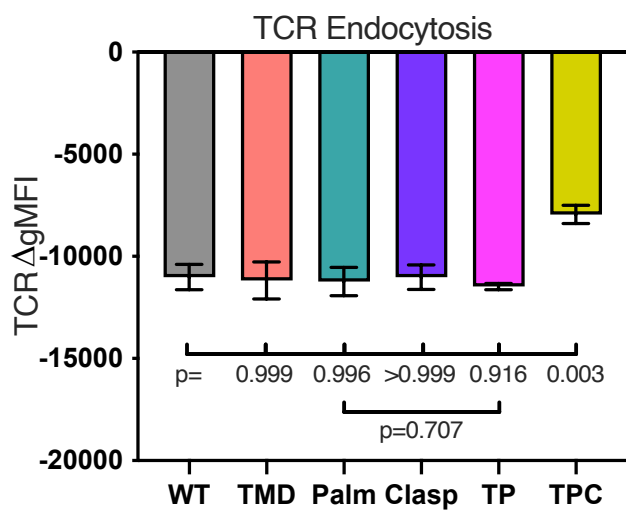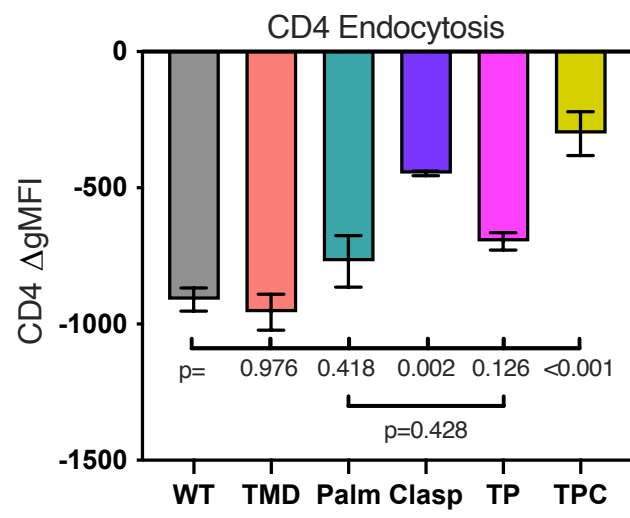

Figure 2 — figure supplement 3

Supplement: supp [file elife_poa_e79508_Figure_2_figure_supplement_3.pdf › elife_poa_e79508_Figure_2_figure_supplement_3.pdf]

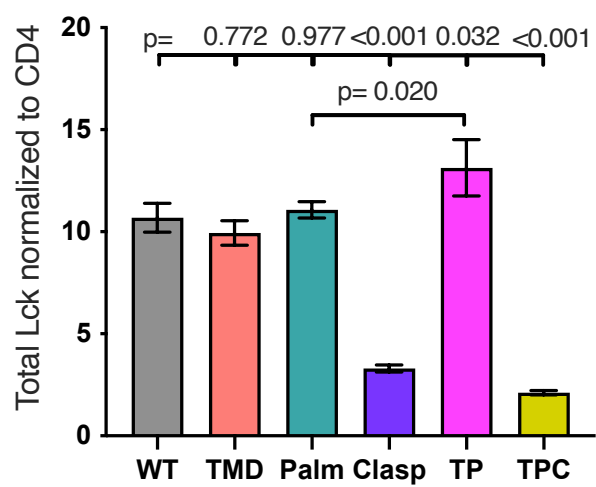

Figure 2 — figure supplement 4

Supplement: supp [file elife_poa_e79508_Figure_2_figure_supplement_4.pdf › elife_poa_e79508_Figure_2_figure_supplement_4.pdf]

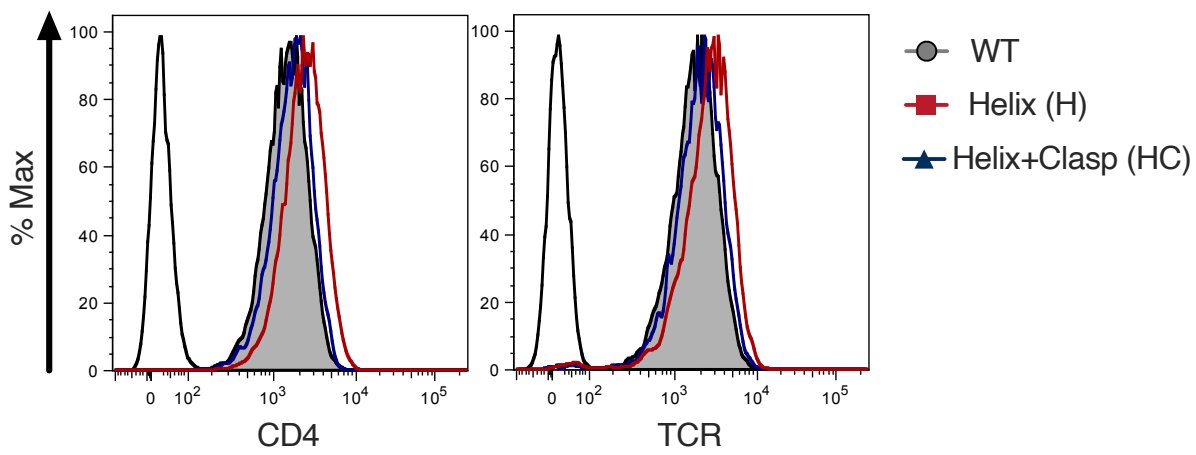

Figure 3 — Figure Supplement 1

Supplement: supp [file elife_poa_e79508_Figure_3_figure_supplement_1.pdf › elife_poa_e79508_Figure_3_figure_supplement_1.pdf]

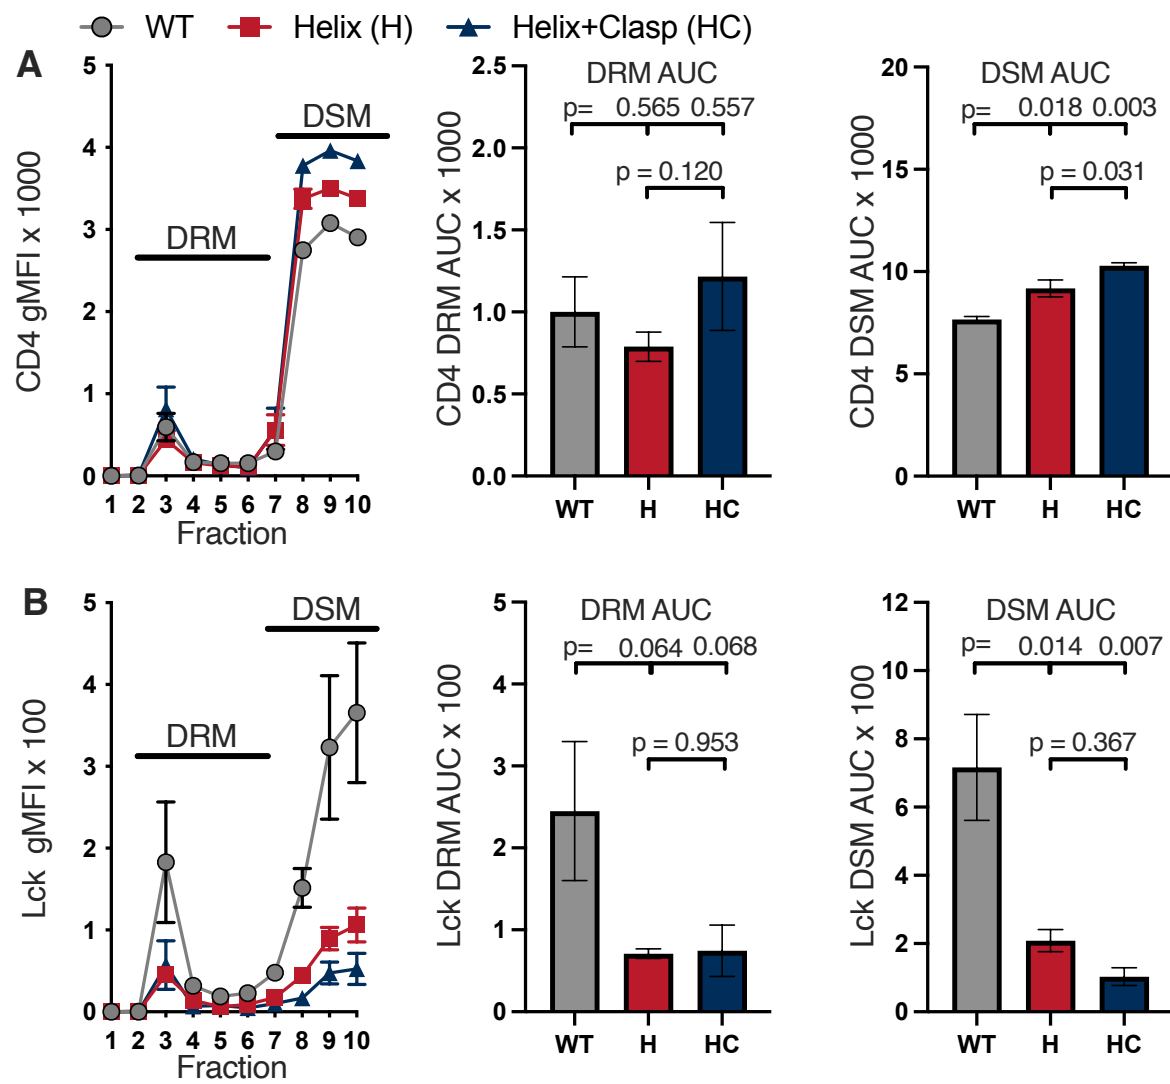

Figure 3 — Figure Supplement 2

Supplement: supp [file elife_poa_e79508_Figure_3_figure_supplement_2.pdf › elife_poa_e79508_Figure_3_figure_supplement_2.pdf]

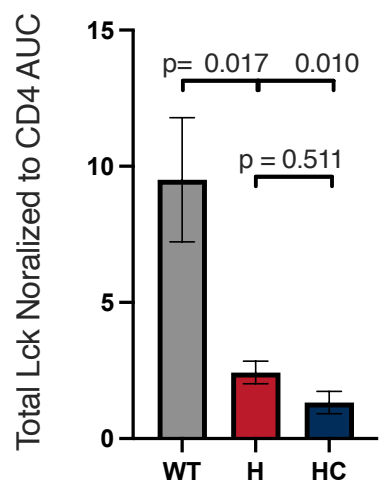

Figure 3 — Figure Supplement 3

Supplement: supp [file elife_poa_e79508_Figure_3_figure_supplement_3.pdf › elife_poa_e79508_Figure_3_figure_supplement_3.pdf]

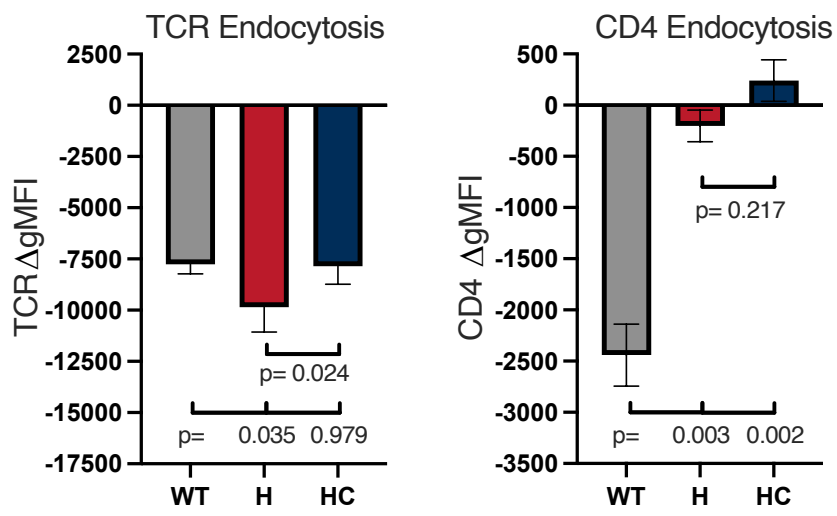

Figure 3 — Figure Supplement 4

Supplement: supp [file elife_poa_e79508_Figure_3_figure_supplement_4.pdf › elife_poa_e79508_Figure_3_figure_supplement_4.pdf]

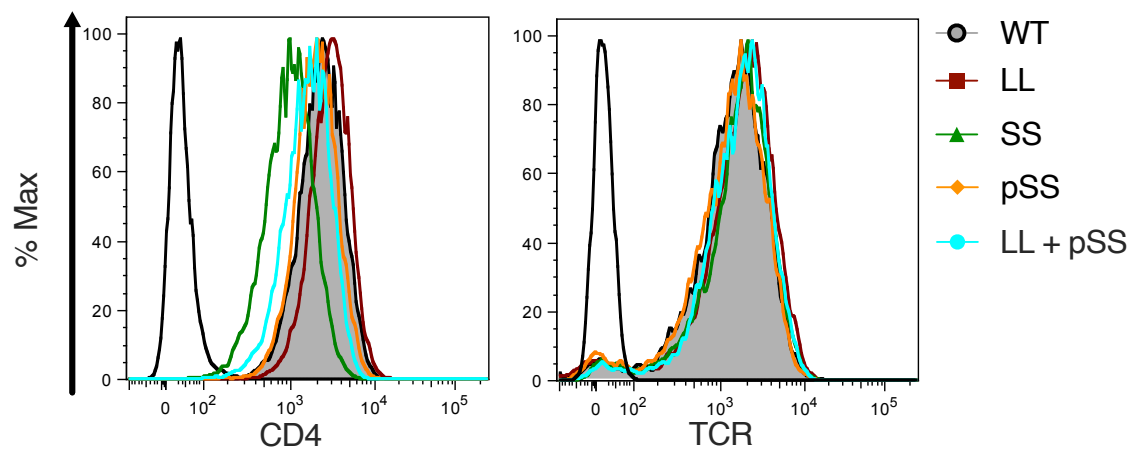

Figure 4 — Figure Supplement 1

Supplement: supp [file elife_poa_e79508_Figure_4_figure_supplement_1.pdf › elife_poa_e79508_Figure_4_figure_supplement_1.pdf]

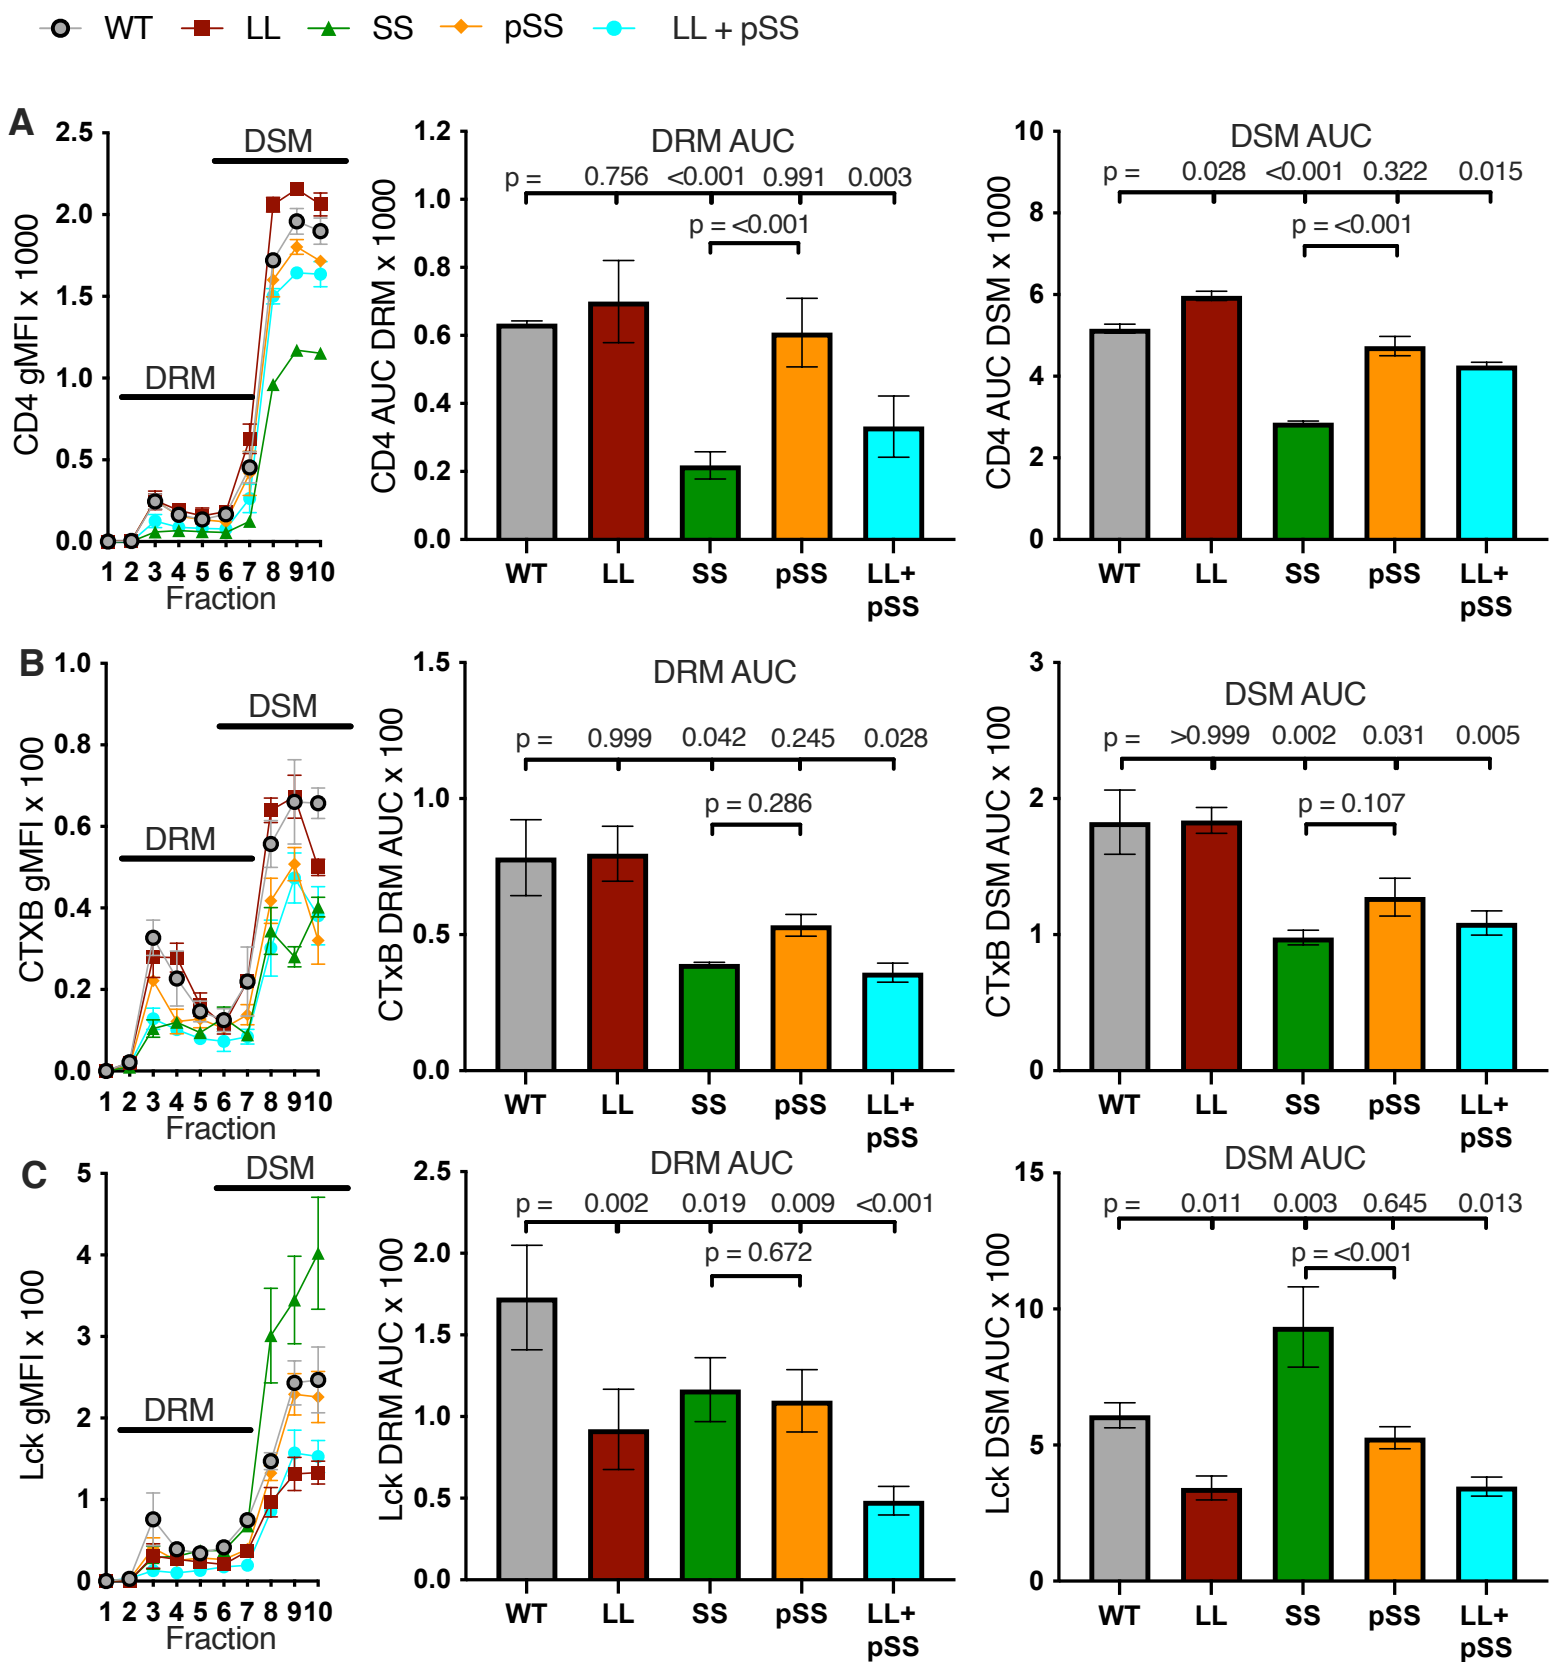

Figure 4 — Figure Supplement 2

Supplement: supp [file elife_poa_e79508_Figure_4_figure_supplement_2.pdf › elife_poa_e79508_Figure_4_figure_supplement_2.pdf]

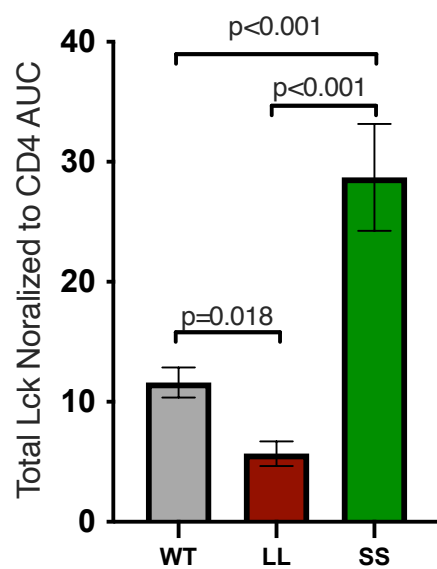

Figure 4 — Figure Supplement 3

Supplement: supp [file elife_poa_e79508_Figure_4_figure_supplement_3.pdf › elife_poa_e79508_Figure_4_figure_supplement_3.pdf]

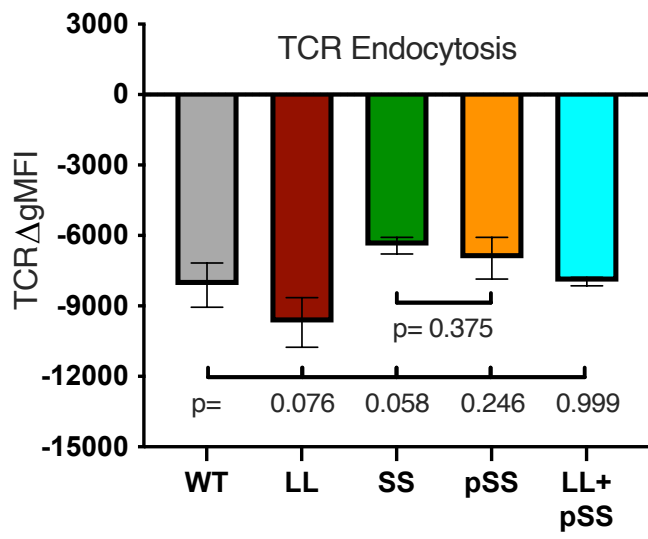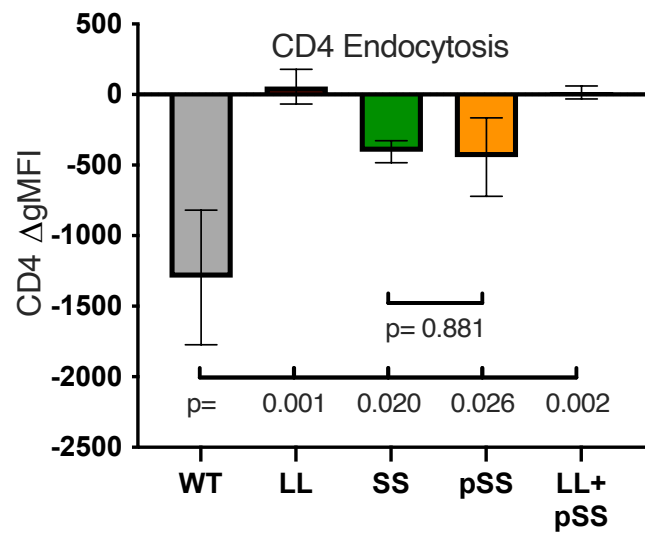

Figure 4 — Figure Supplement 4

Supplement: supp [file elife_poa_e79508_Figure_4_figure_supplement_4.pdf › elife_poa_e79508_Figure_4_figure_supplement_4.pdf]

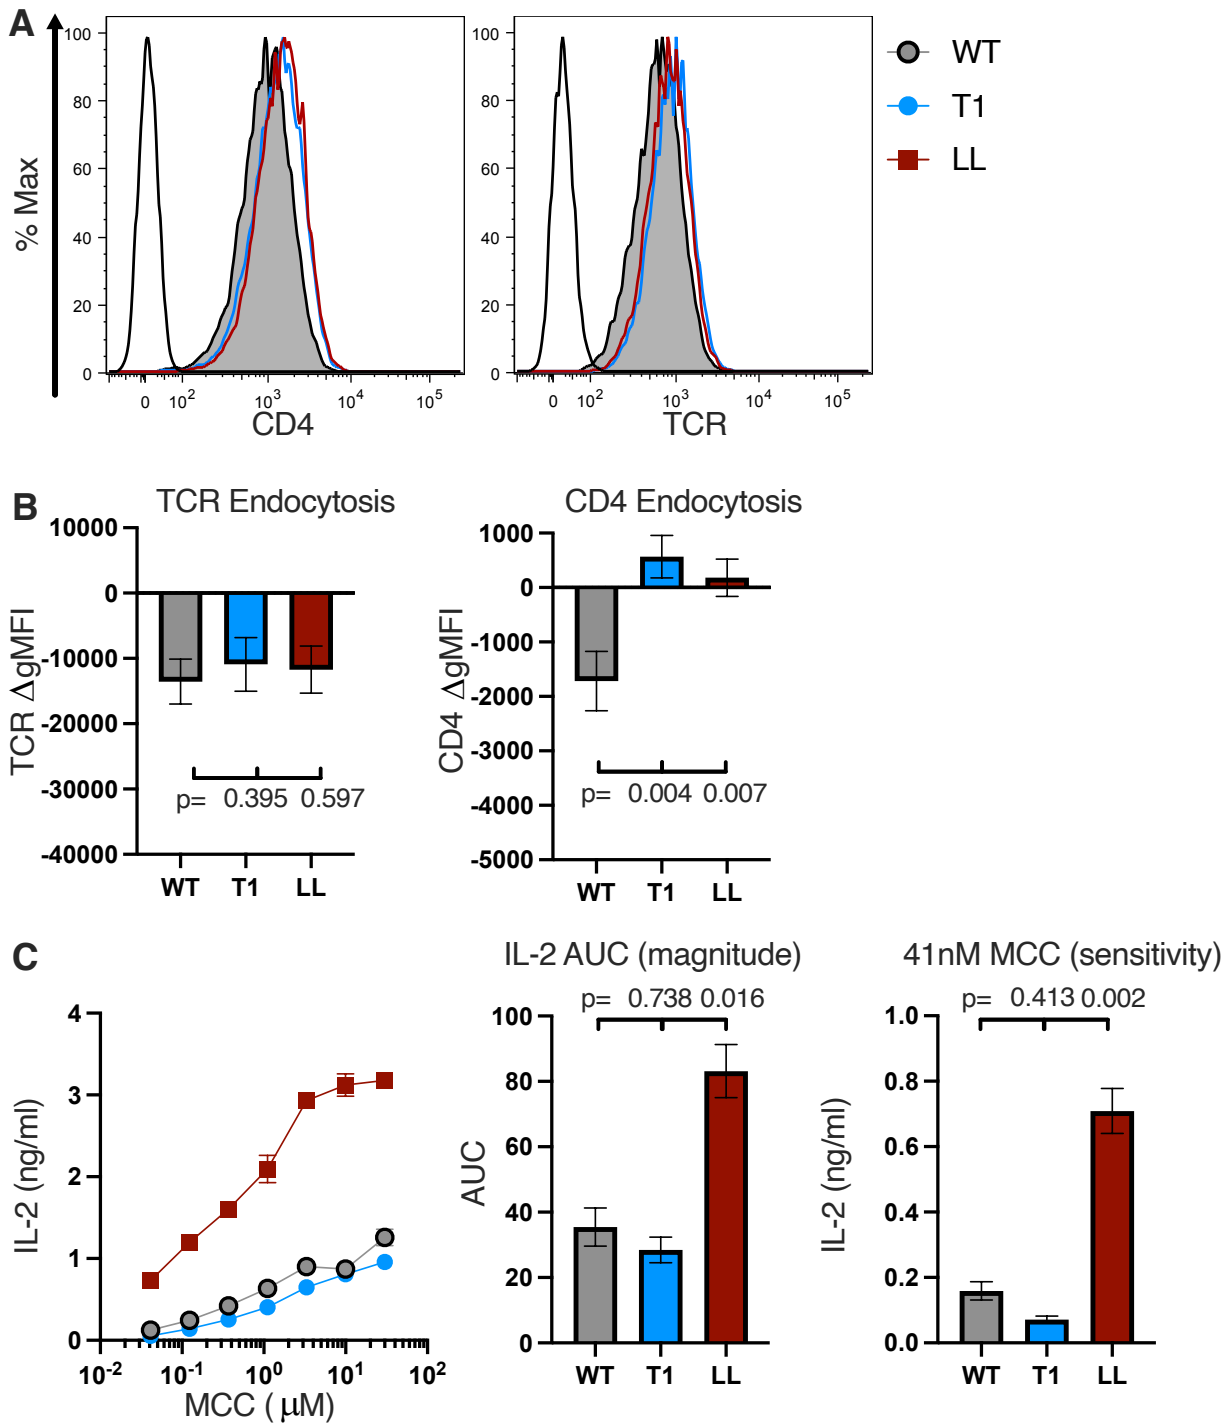

Figure 4 — Figure Supplement 5

Supplement: supp [file elife_poa_e79508_Figure_4_figure_supplement_5.pdf › elife_poa_e79508_Figure_4_figure_supplement_5.pdf]

Line 1: Tethered MCC

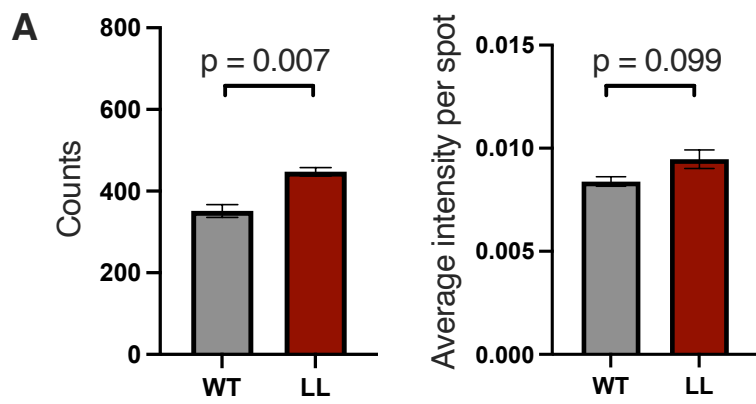

Line 2: Tethered MCC

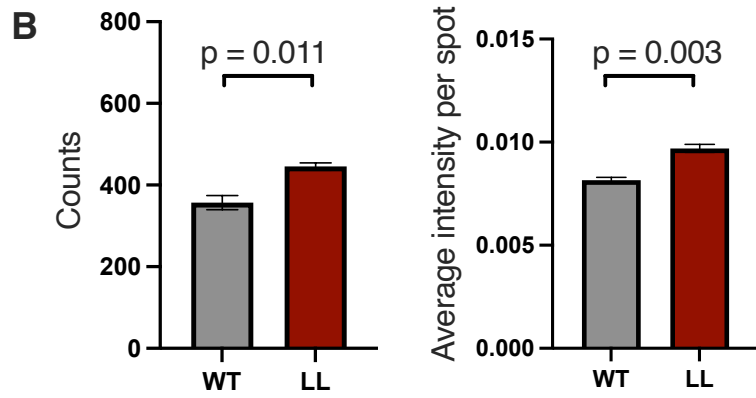

Supplement: supp [file elife_poa_e79508_Figure_4_figure_supplement_6.pdf › elife_poa_e79508_Figure_4_figure_supplement_6.pdf]

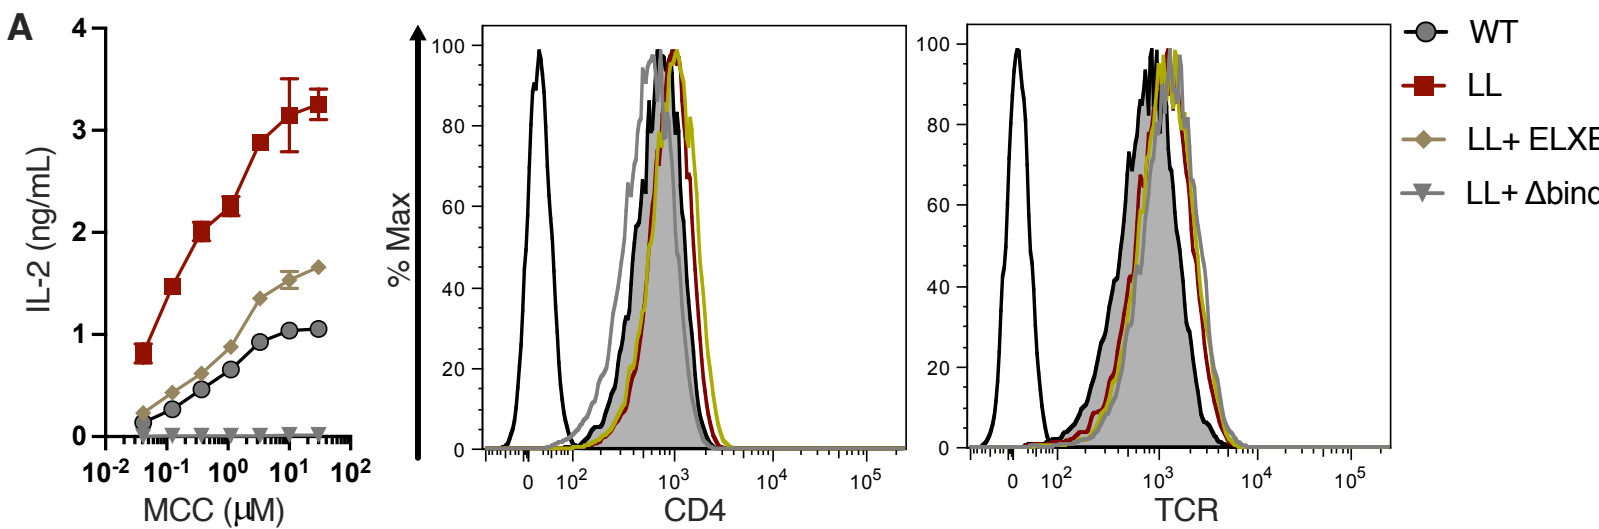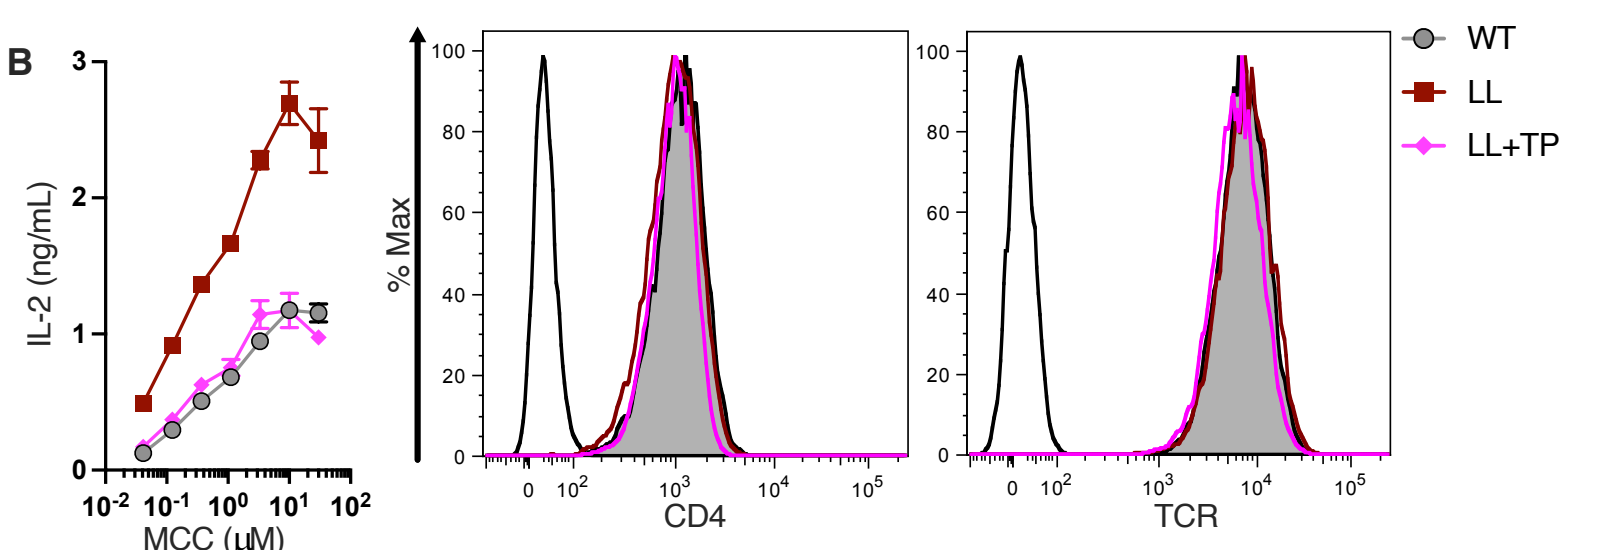

Figure 5 — figure supplement 1

Supplement: supp [file elife_poa_e79508_Figure_5_figure_supplement_1.pdf › elife_poa_e79508_Figure_5_figure_supplement_1.pdf]

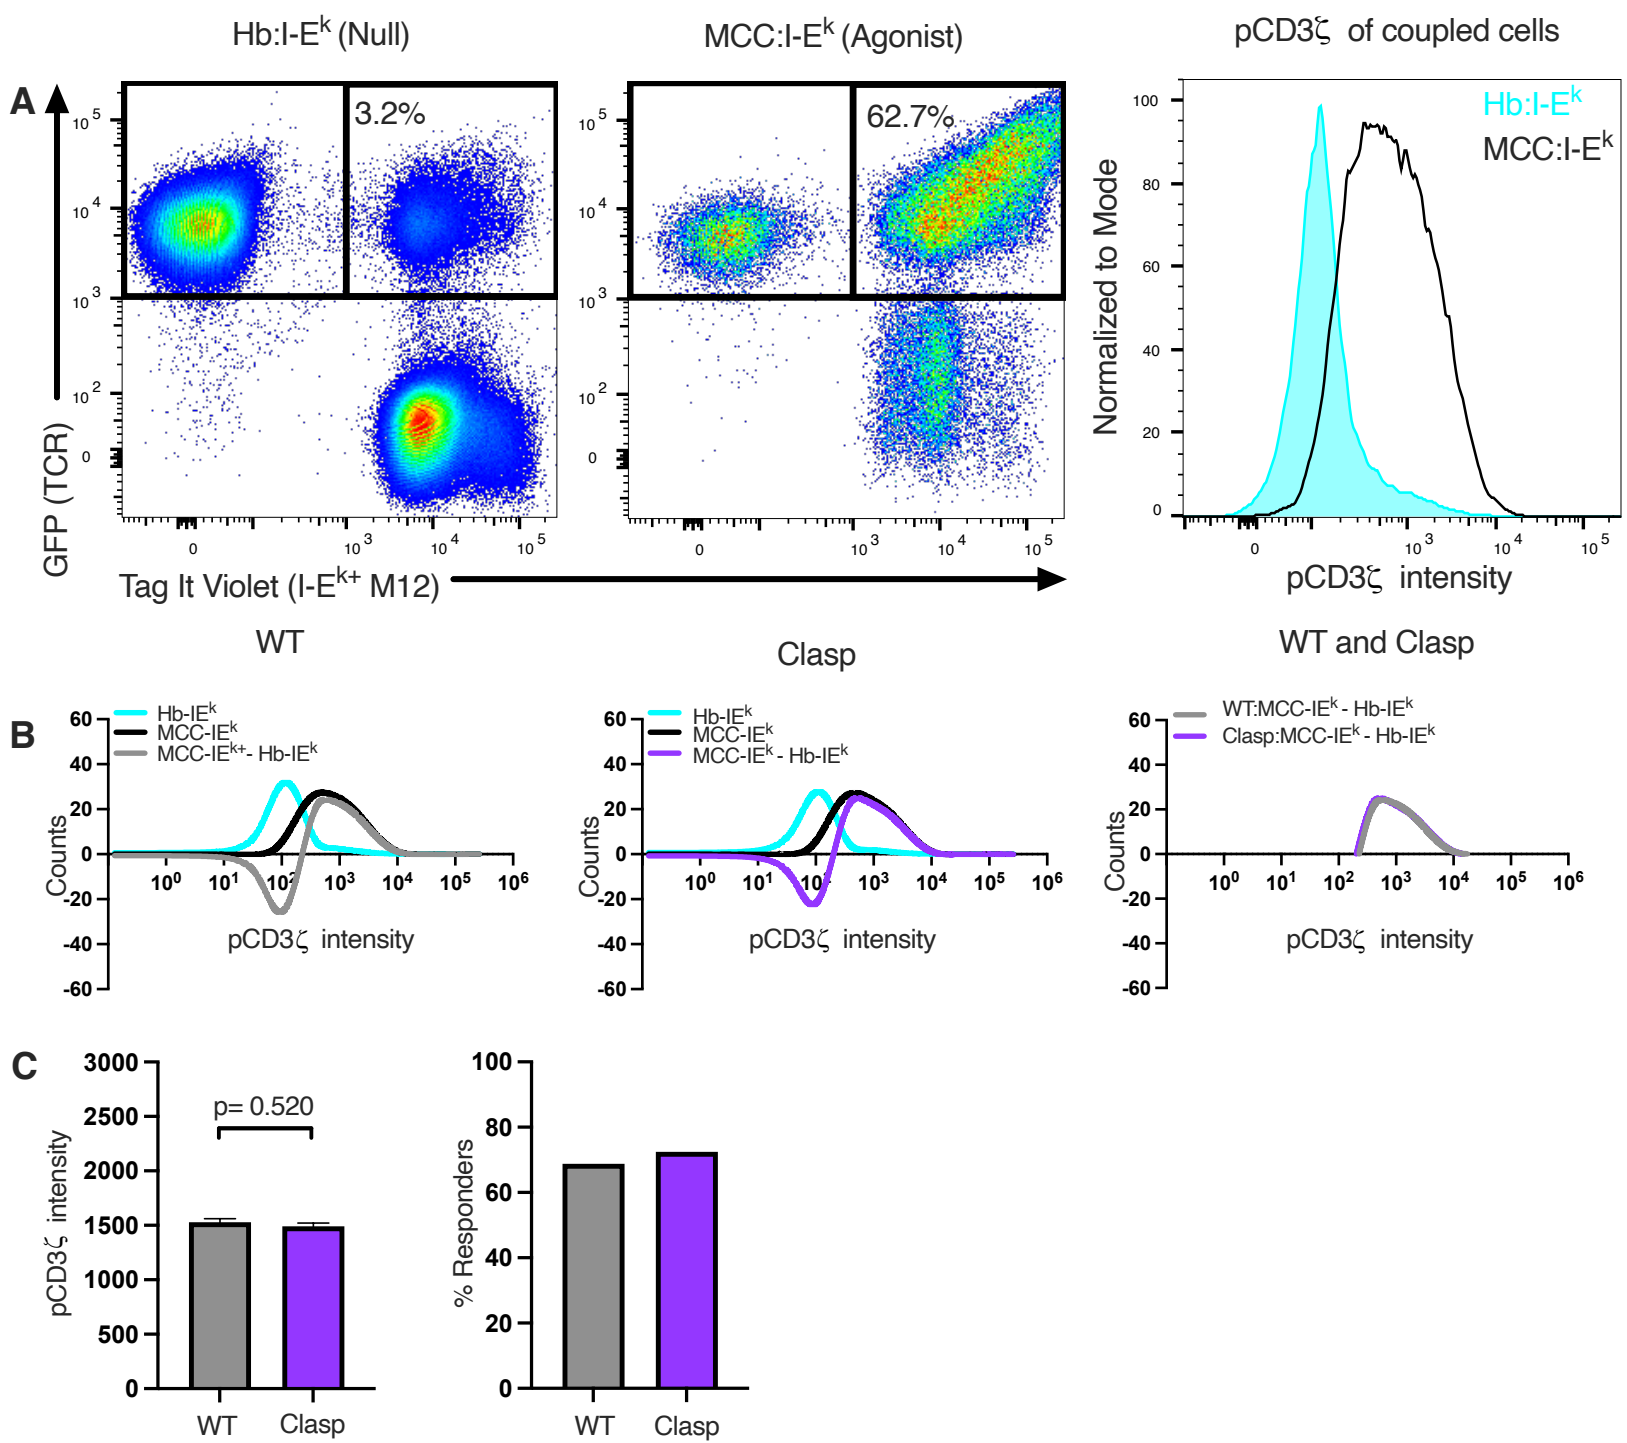

Figure 6 — figure supplement 1

Supplement: supp [file elife_poa_e79508_Figure_6_figure_supplement_1.pdf › elife_poa_e79508_Figure_6_figure_supplement_1.pdf]

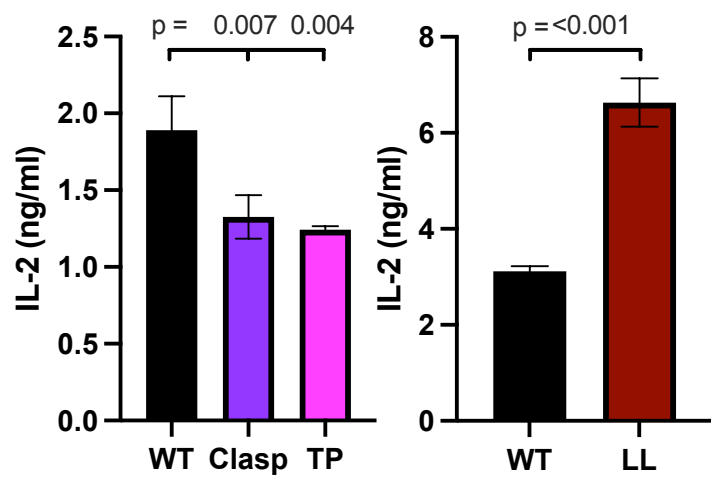

Figure 6 — figure supplement 2

Supplement: supp [file elife_poa_e79508_Figure_6_figure_supplement_2.pdf › elife_poa_e79508_Figure_6_figure_supplement_2.pdf]

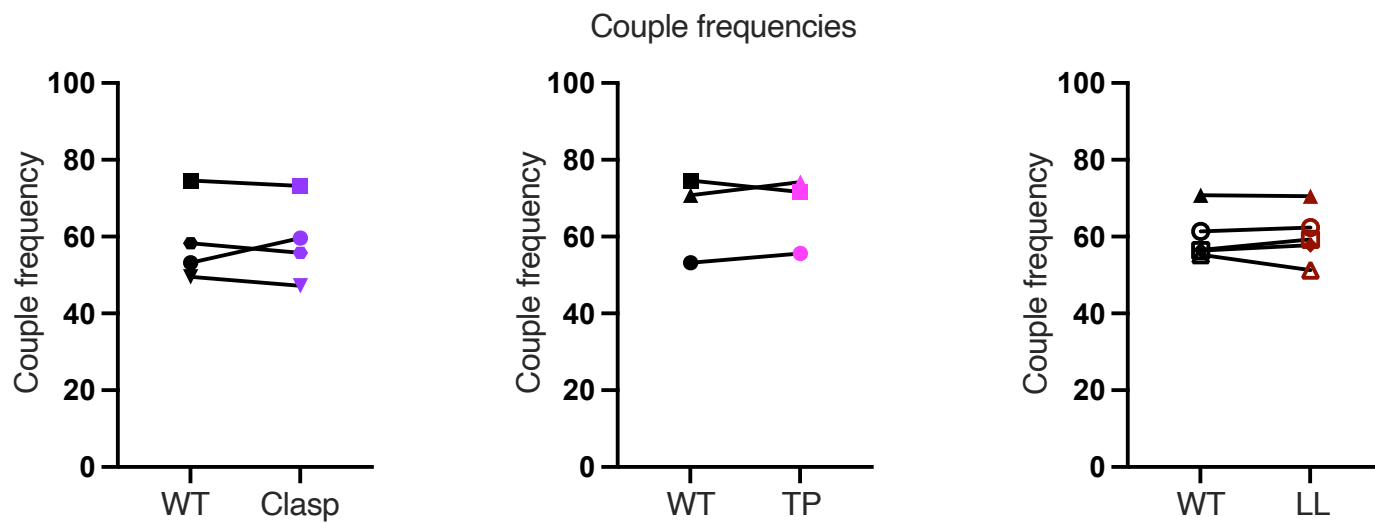

Figure 6 — figure supplement 3

Supplement: supp [file elife_poa_e79508_Figure_6_figure_supplement_3.pdf › elife_poa_e79508_Figure_6_figure_supplement_3.pdf]

# WT vs Clasp

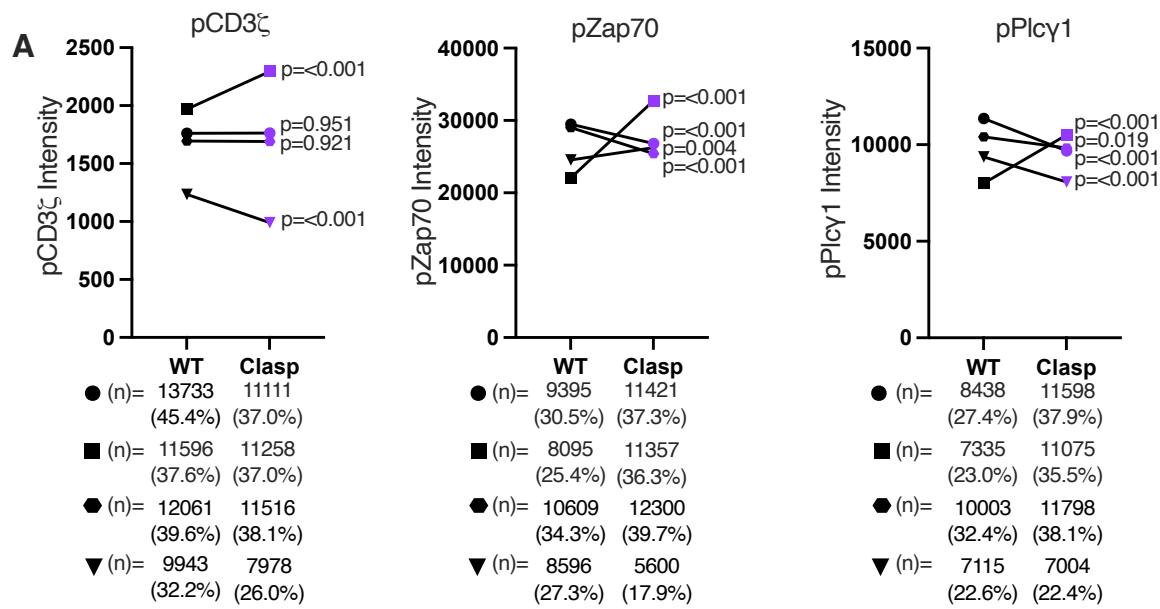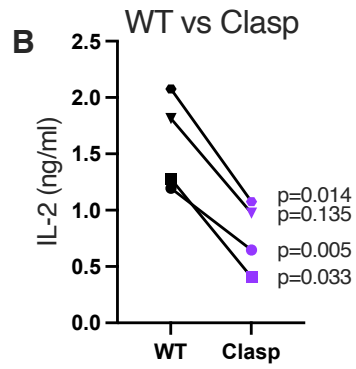

Figure 6 — figure supplement 4

Supplement: supp [file elife_poa_e79508_Figure_6_figure_supplement_4.pdf › elife_poa_e79508_Figure_6_figure_supplement_4.pdf]
